# Supplementary material
Source: publisher figshare collection journal article supplement (https://gsajournals.figshare.com/ndownloader/files/28102731)
Supplement: Supplementary file 1 [file 28102731]

## Sheet: Table S2
Table S2. Lambda values used in Box-Cox transformation of 15 fresh kernel elemental phenotypes in sweet corn.
	Lambda value
Trait	Both locations	NY	WI
Boron	-1	-0.5	1
Cadmium	-0.5	-1	-0.5
Calcium	-0.5	-2	-0.5
Copper	-0.5	-0.5	-0.5
Iron	-1	-0.5	-1
Magnesium	-2	-2	-1
Manganese	-0.5	-0.5	-0.5
Molybdenum	-1	-1	0
Nickel	-0.5	-1	-0.5
Phosphorus	1	1	1
Potassium	1	1	-0.5
Rubidium	-2	-2	-2
Strontium	-1	-2	-0.5
Sulfur	-1	1	1
Zinc	0	-0.5	1
